# Supplementary material for: Traceless solid-phase synthesis and β-turn propensity of 1,3-thiazole-based peptidomimetics
Source: Royal Society of Chemistry journal article supplement (doi:10.1039/d0ra10127c), 2021-01-01
Supplement: d0ra10127c1.pdf [file d0ra10127c1.pdf]

**Supplementary Information**

**Traceless solid-phase synthesis and  $\beta$ -turn propensity of thiazole-based  
peptidomimetics**

Aizhan Abdildinova and Young-Dae Gong\*

*Innovative Drug Library Research Center, Department of Chemistry, College of Science,*

*Dongguk University, 30, Pildong-ro 1-gil, Jung-gu, Seoul 04620, Korea*

Corresponding author's E-Mail: [ydgong@dongguk.edu](mailto:ydgong@dongguk.edu)

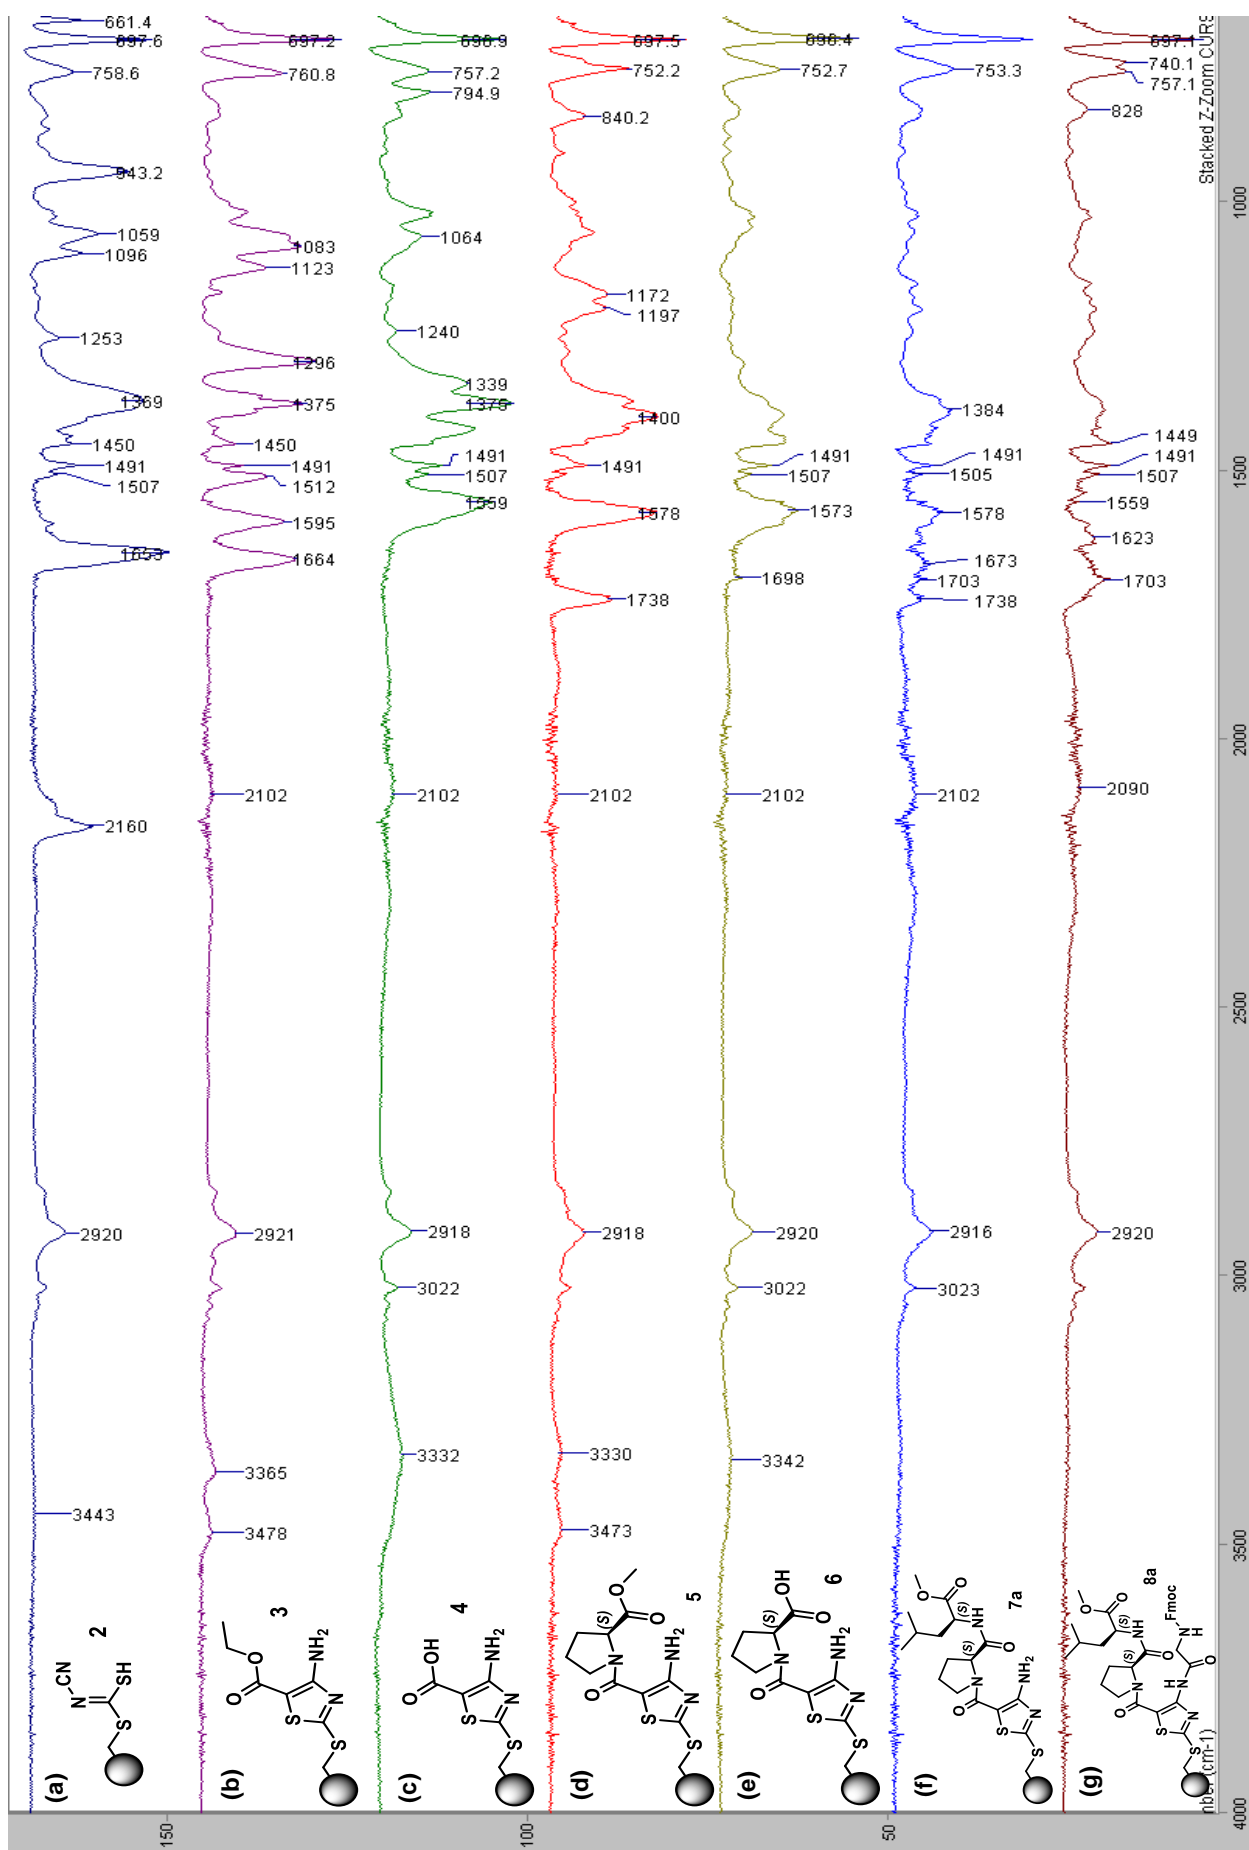

**Fig. S1.** Representative ATR-FTIR spectrum of the corresponding resins

**Table S1.** Acylation Reaction Conditions Optimization in Solution Phase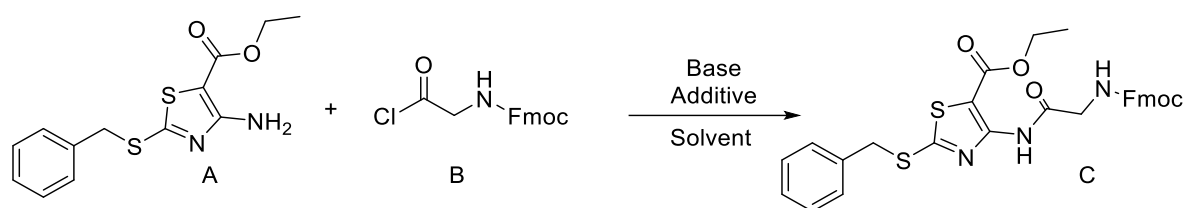

| No | Base                                                | Additive               | Solvent            | Temp              | Time        | Yield       | Remark                    |
|----|-----------------------------------------------------|------------------------|--------------------|-------------------|-------------|-------------|---------------------------|
| 1  | NaH<br>2.0 eq                                       | -                      | DMF                | RT                | 17 h        | -           | No Product                |
| 2  | <b>K<sub>2</sub>CO<sub>3</sub></b><br><b>2.0 eq</b> | -                      | <b>1,4-Dioxane</b> | <b>RT → 50 °C</b> | <b>28 h</b> | <b>36%</b>  | <b>LC/MS Checked</b>      |
| 3  | <i>t</i> -BuOK<br>2.0 eq                            | -                      | DMF                | RT                | 24 h        | -           | No Product                |
| 4  | TEA<br>2.0 eq                                       | -                      | DCM                | RT                | 24 h        | No Reaction | -                         |
| 5  | DIPEA<br>2.0 eq                                     | -                      | DCM                | RT                | 24 h        | No Reaction | -                         |
| 6  | Pyridine<br>2.0 eq                                  | -                      | DCM                | RT → 50 °C        | 24 h        | Traces      | LC/MS Crude               |
| 7  | K <sub>2</sub> CO <sub>3</sub><br>4.0 eq            | -                      | 1,4-Dioxane        | 60 °C →<br>100 °C | 29 h        | -           | Decomposition at 100 °C   |
| 8  | K <sub>2</sub> CO <sub>3</sub><br>2.0 eq            | DMAP<br>Cat.<br>Amount | 1,4-Dioxane        | 60 °C             | 23 h        | No Reaction | -                         |
| 9  | K <sub>2</sub> CO <sub>3</sub><br>2.0 eq            | -                      | DMF                | RT                | 1 h         | -           | No Product                |
| 10 | <b>K<sub>2</sub>CO<sub>3</sub></b><br><b>2.0 eq</b> | -                      | <b>1,4-Dioxane</b> | <b>80 °C</b>      | <b>14 h</b> | <b>78%</b>  | <b>LC/MS Purity 98.7%</b> |

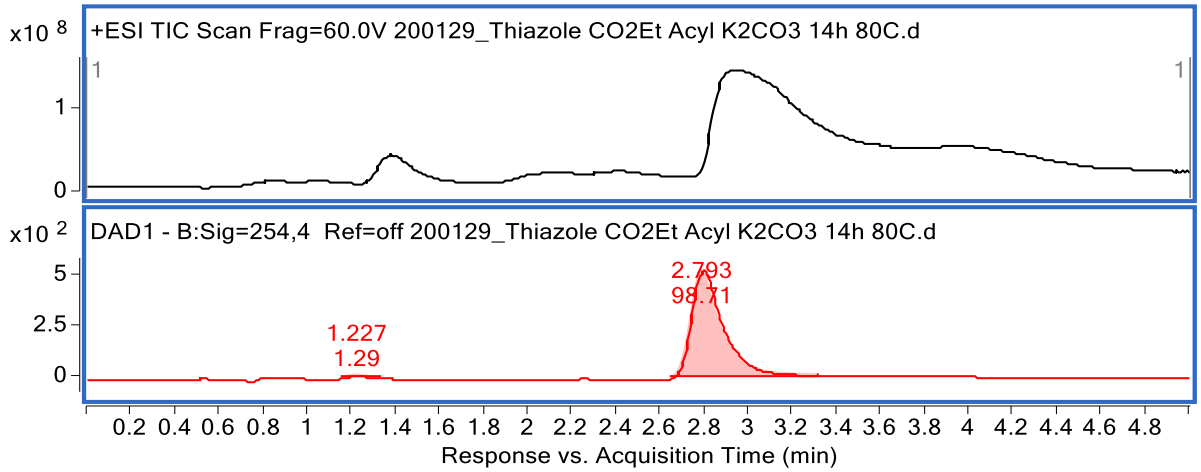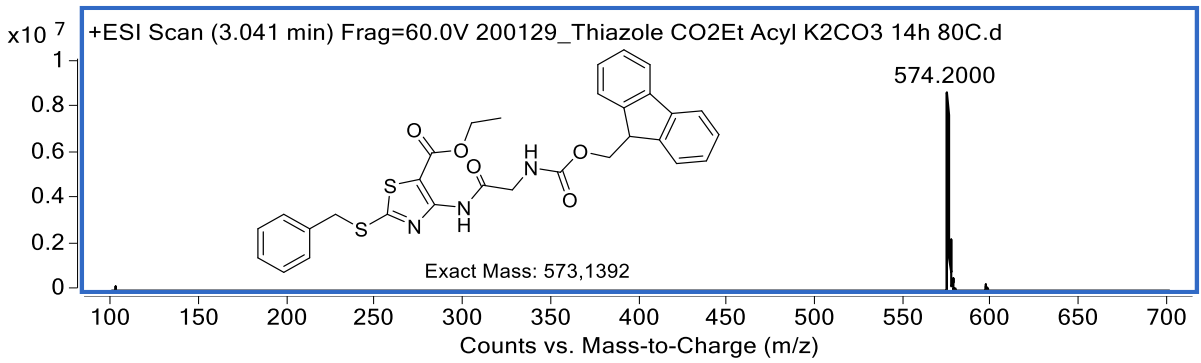

LC/MS - C

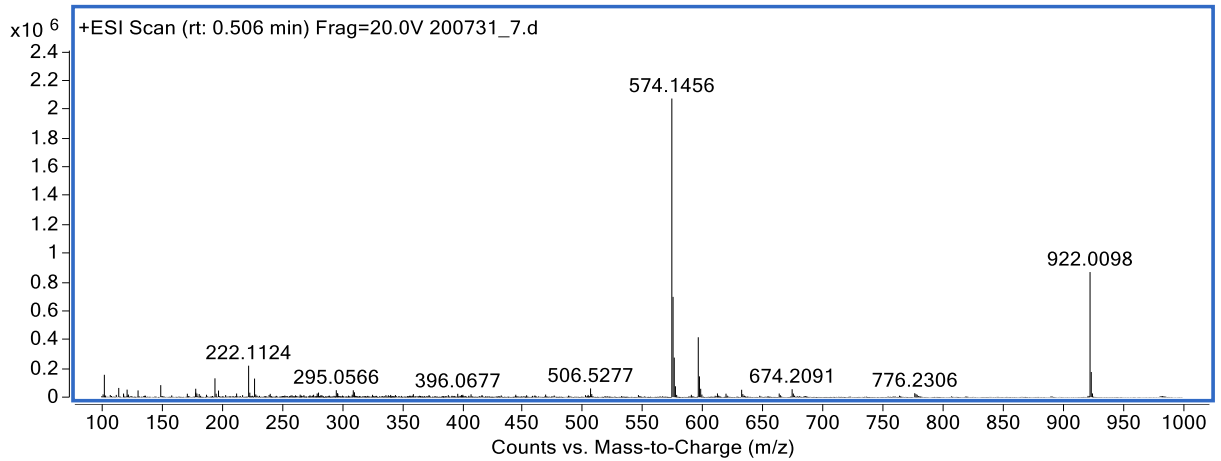

HR/MS - C

**Table S2.** Calculated dihedral angles for  $\beta$ -turn mimetics **12**

| No         | $\varphi(i+1)$ | $\psi(i+1)$ | $\varphi(i+2)$ | $\psi(i+2)$ |
|------------|----------------|-------------|----------------|-------------|
| <b>12a</b> | -62,85         | 95,89       | -73            | 116,65      |
| <b>12b</b> | -63,87         | 84,93       | -84,21         | 103,72      |
| <b>12c</b> | -75,54         | 41,79       | -73,74         | -9,69       |
| <b>12d</b> | -53,09         | -138,81     | 36,67          | 114,21      |
| <b>12e</b> | -74,47         | -123,06     | -100,22        | 124,89      |

**Table S3.** Calculated physicochemical properties of **12**.

| No         | Molecular Weight | AlogP | pKa                  | Number of HBA | Number of HBD | Number of Rotatable Bonds | Molecular Polar Surface Area | Molecular Surface Area |
|------------|------------------|-------|----------------------|---------------|---------------|---------------------------|------------------------------|------------------------|
| <b>12a</b> | 701,833          | 2,257 | 4.28<br>8.91         | 10            | 6             | 17                        | 236,39                       | 740,7                  |
| <b>12b</b> | 774,886          | 2,874 | 4.28<br>8.91         | 10            | 7             | 17                        | 252,18                       | 786,17                 |
| <b>12c</b> | 785,865          | 2,663 | 4.28<br>8.91<br>9.83 | 11            | 7             | 17                        | 256,62                       | 782,9                  |
| <b>12d</b> | 769,866          | 2,905 | 4.28<br>9.83         | 10            | 6             | 17                        | 236,39                       | 771,57                 |
| <b>12e</b> | 808,902          | 3,203 | 1.65<br>4.28<br>9.83 | 10            | 7             | 17                        | 252,18                       | 801                    |

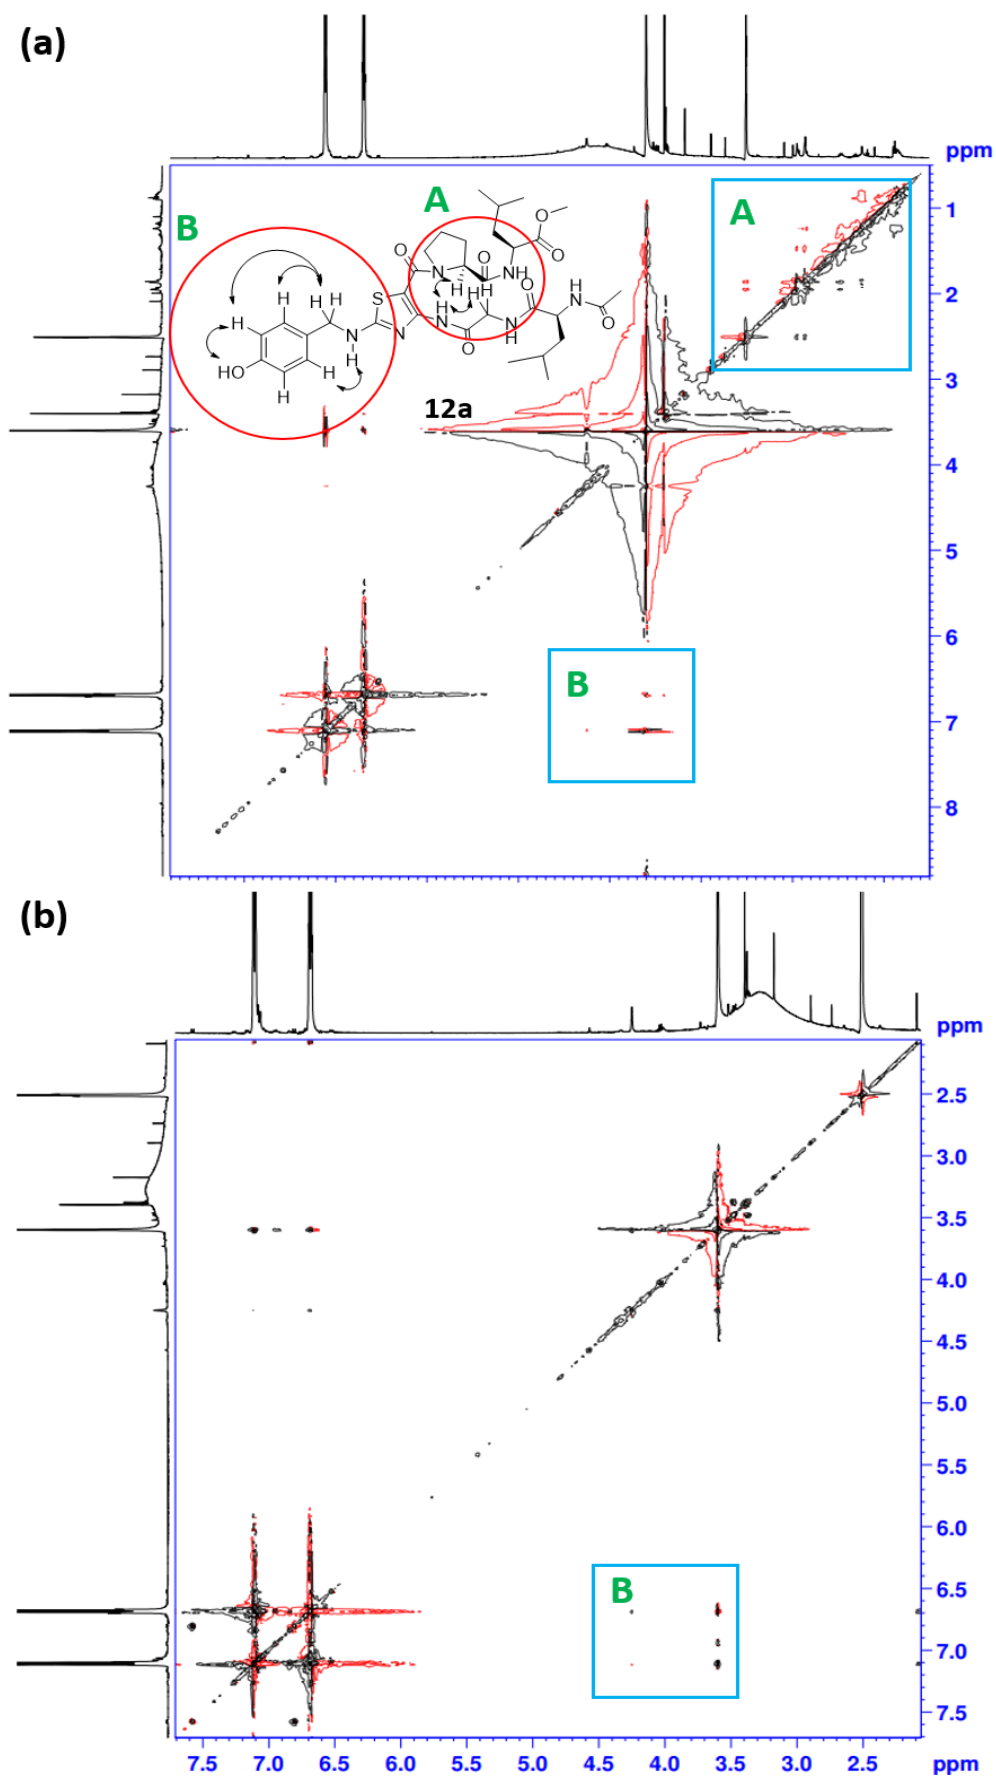

**Fig. S2.** 2D NMR studies of compound **12a** in DMSO- $d_6$ : (a)  $^1\text{H}$ - $^1\text{H}$  ROESY with NOE cross peaks at sections **A** (for Gly-Pro) and **B** (for 4-OH-Bn-NH); (b)  $^1\text{H}$ - $^1\text{H}$  TOCSY cross peaks for 4-OH-Bn-NH (section **B**).

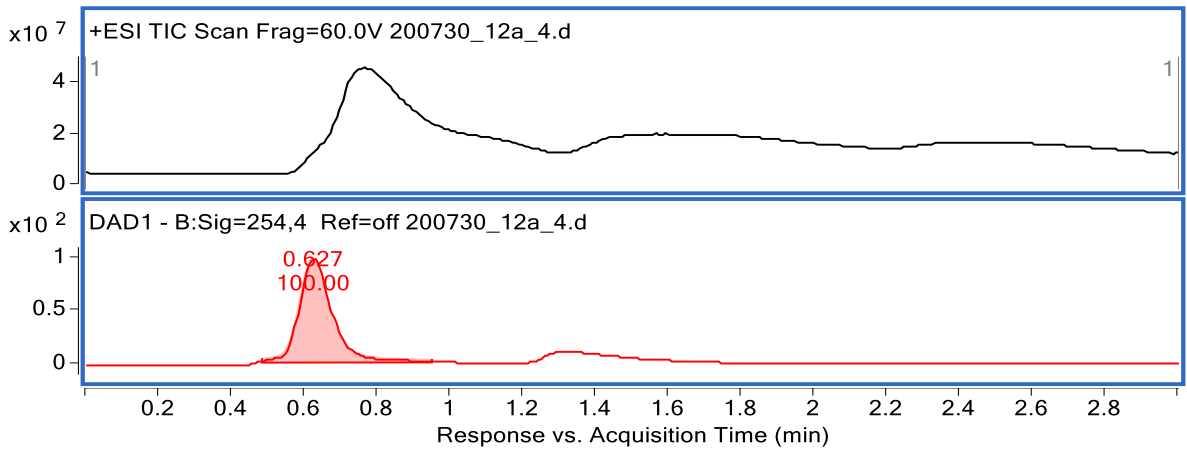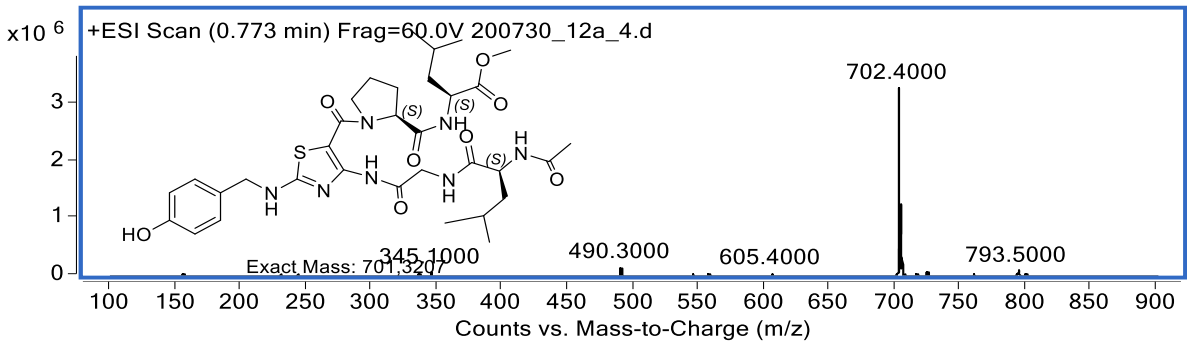

LC/MS – 12a

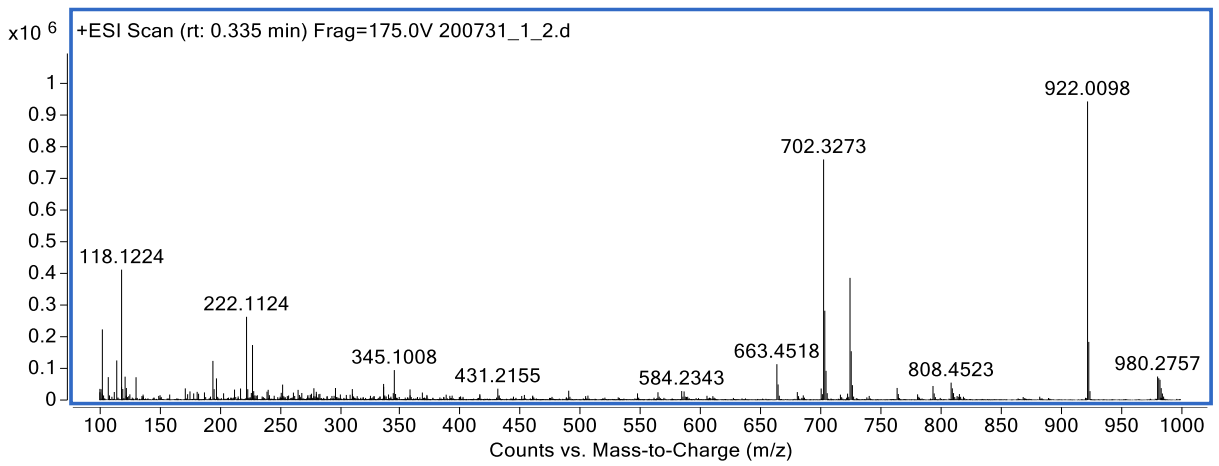

HR/MS – 12a

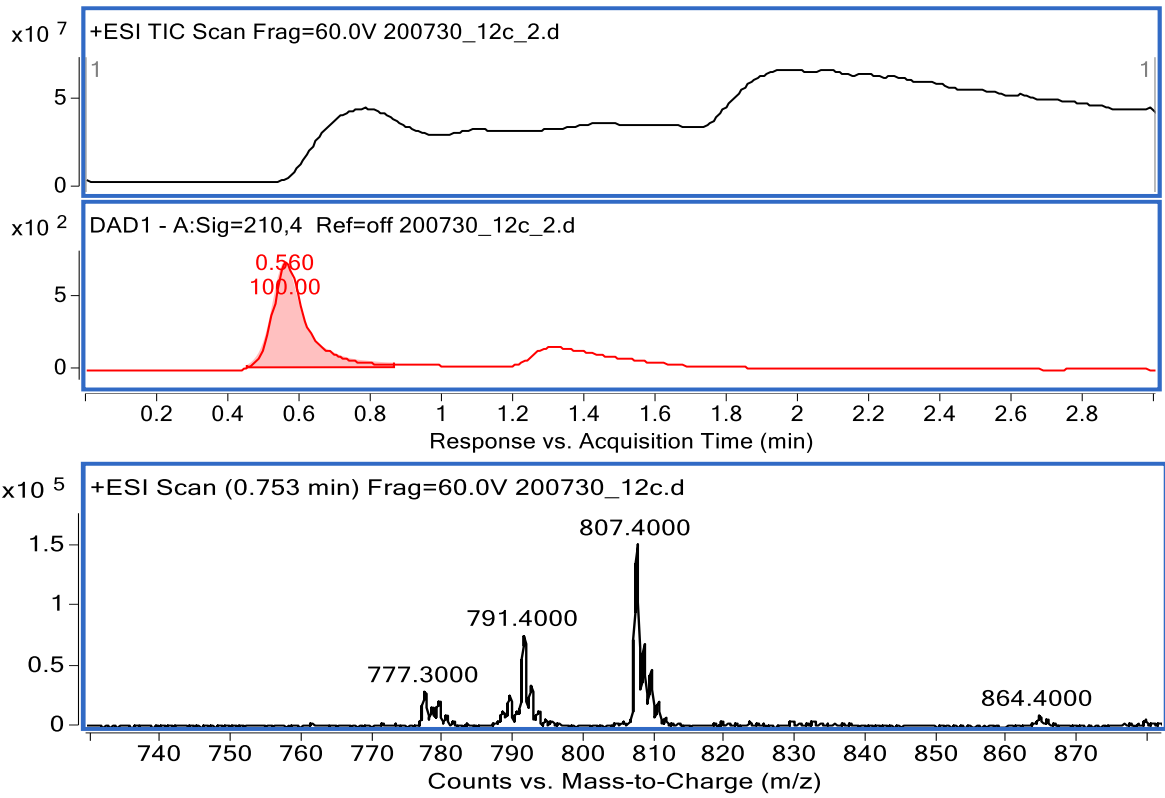

**LC/MS – 12b**

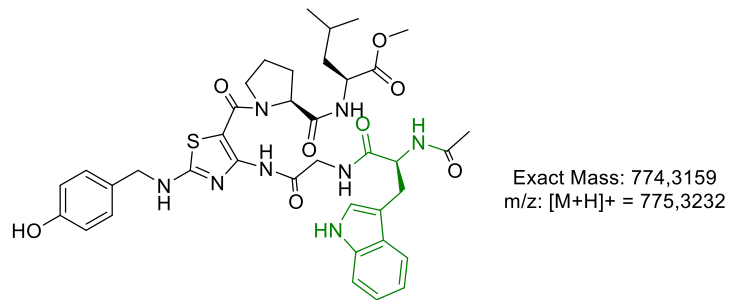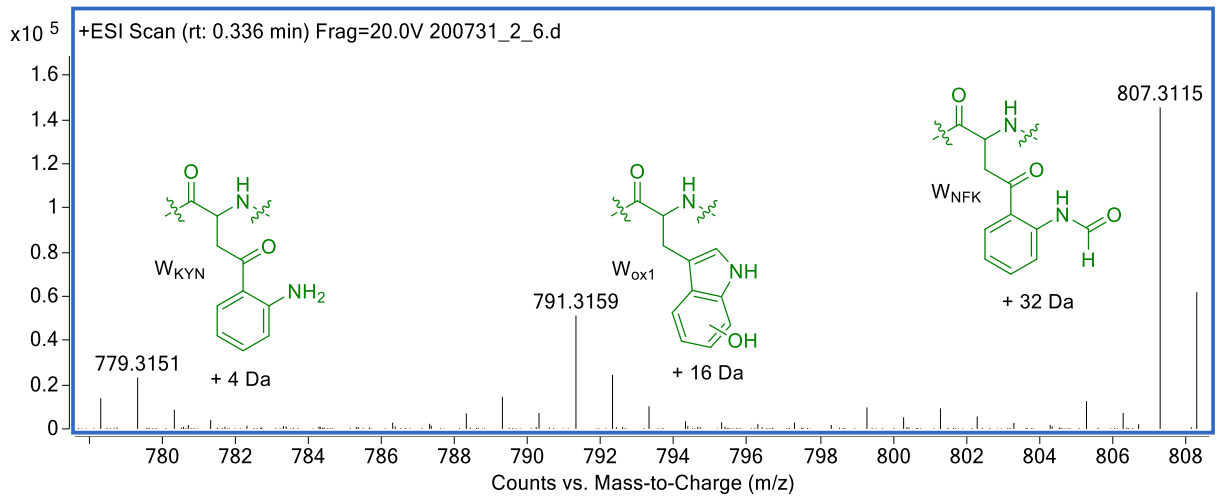

**HR/MS – 12b**



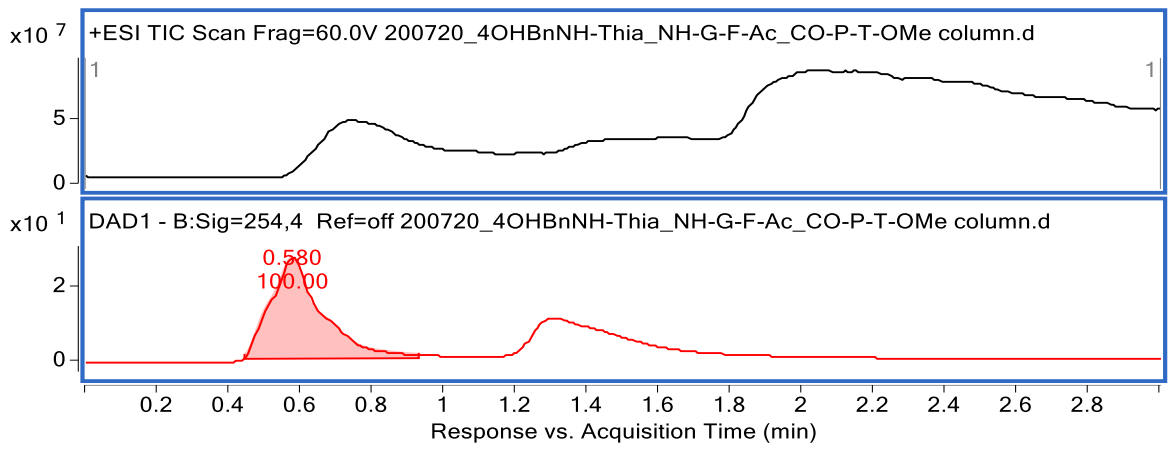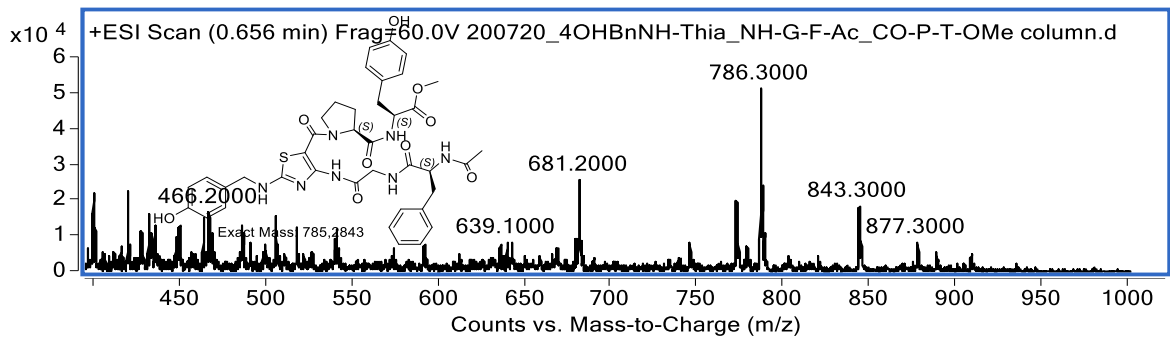

**LC/MS – 12c**

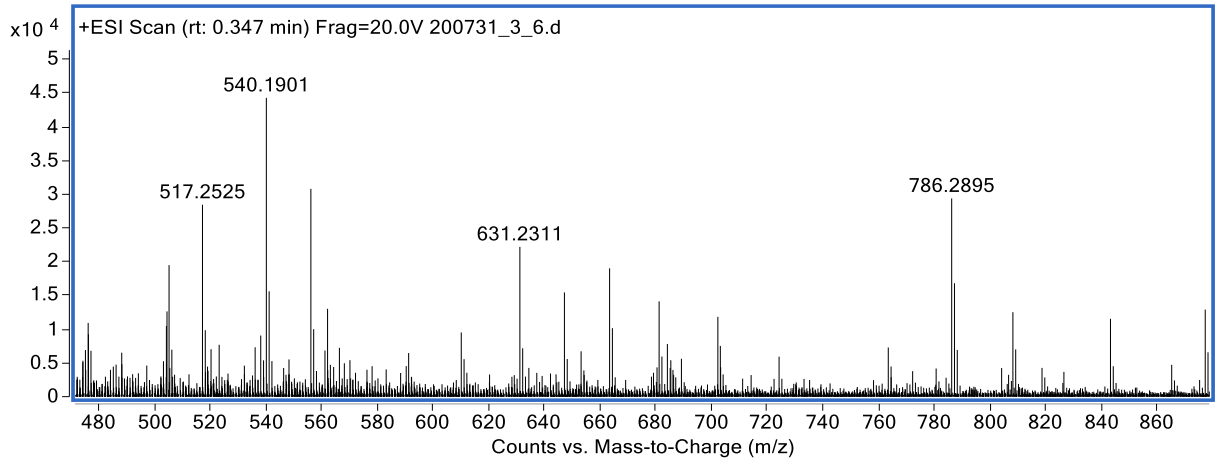

**HR/MS – 12c**

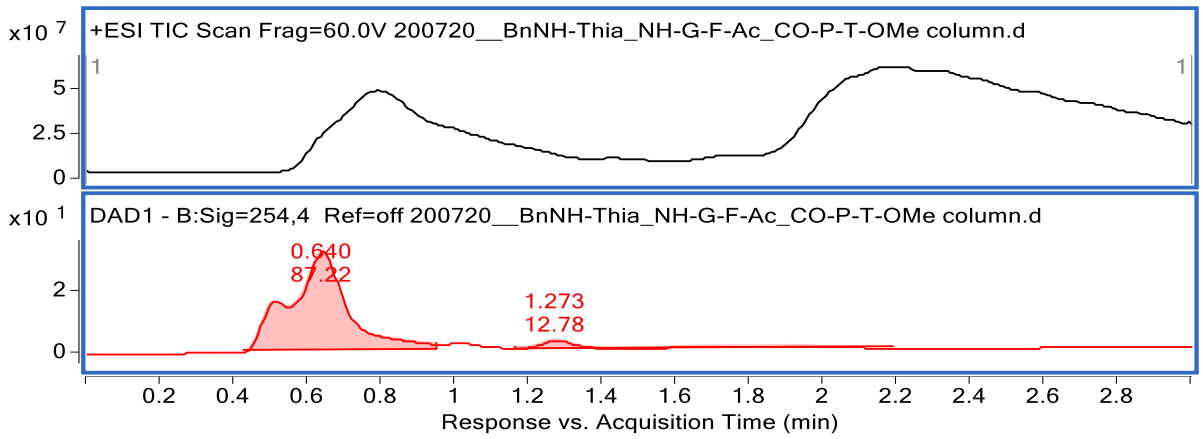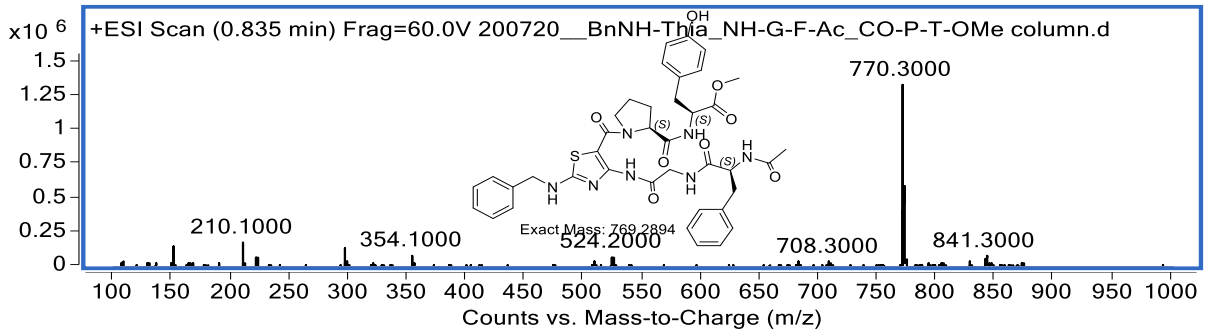

LC/MS – 12d

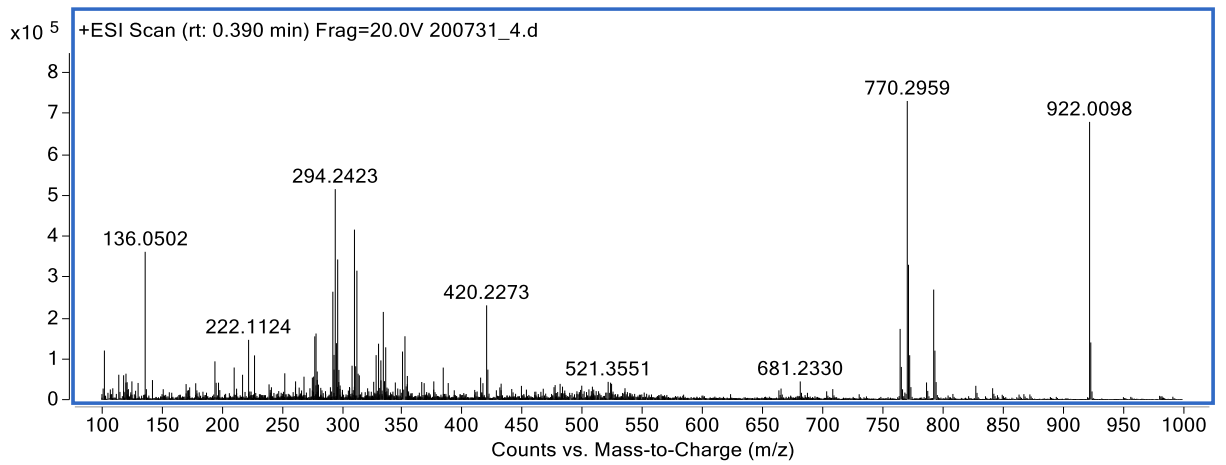

HR/MS – 12d

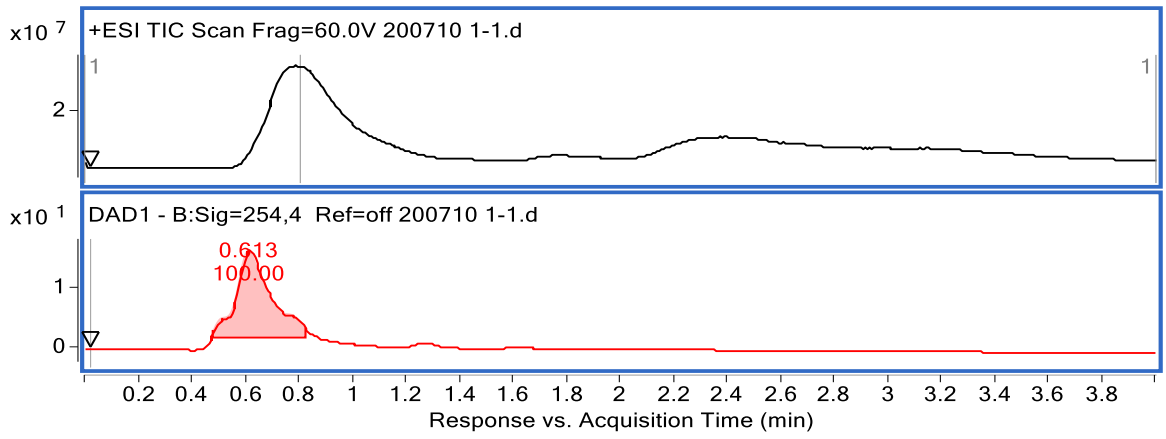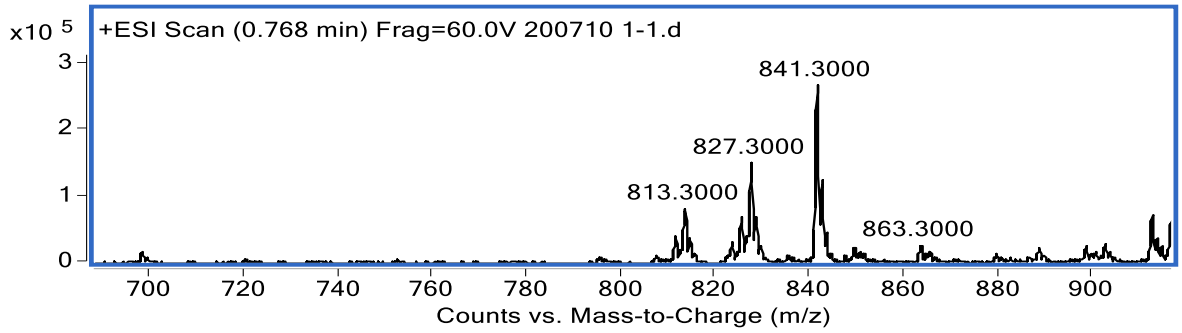

### LC/MS – 12e

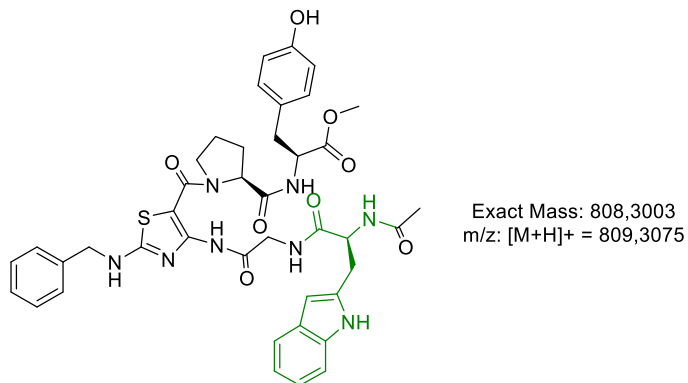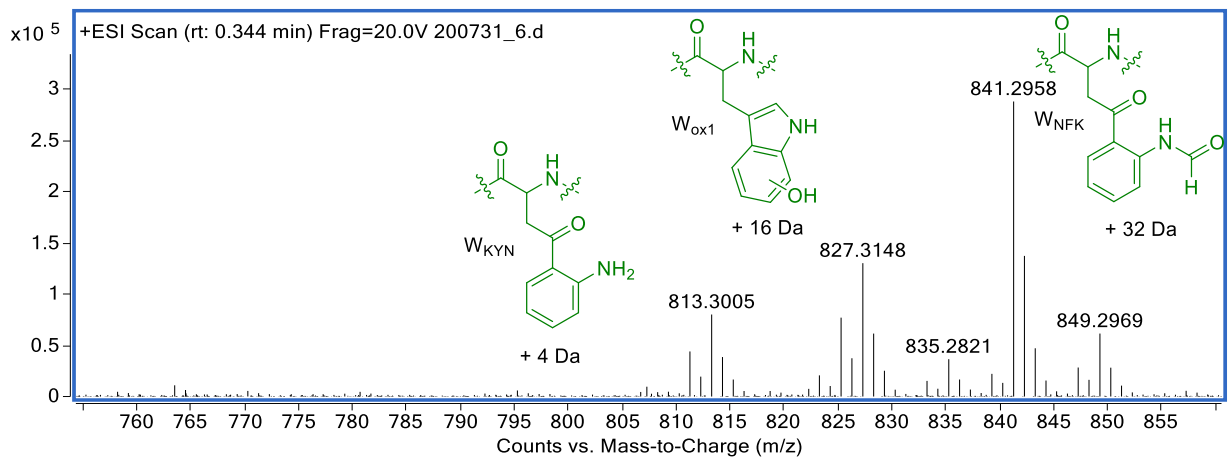

### HR/MS – 12e
